# Supplementary material
Source: publisher figshare collection journal article supplement (https://frontiersin.figshare.com/ndownloader/files/17856464)

**Supplementary figure 1. Accessions resistant to CMV-LS. A** Accessions of the oriental melon group sharing Haplotype 3 with the resistant control SC. **B** Accessions of the oriental melon group sharing Haplotype 4. **C** Resistant accession of the dudaim group with Hap-2-QPMAfg.

**A**

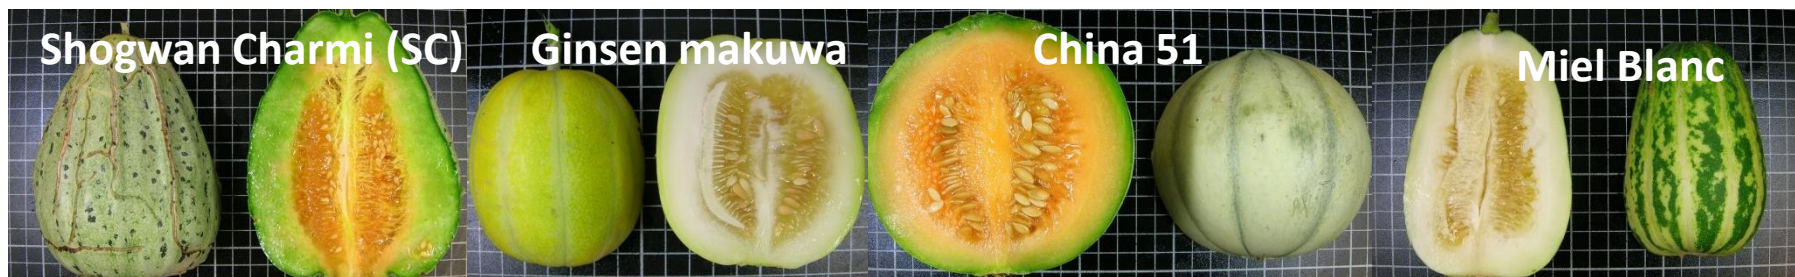

**B**

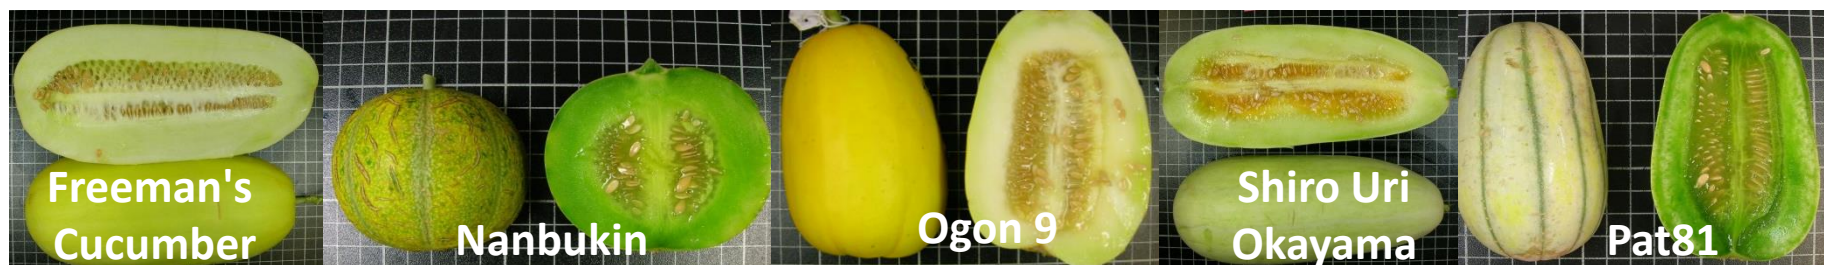

**C**

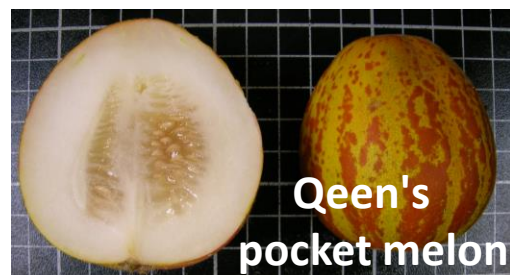

Supplement: Supplementary file [file 17856464]
